# Supplementary material for: Kinematic differences between female national and provincial athletes in the tennis serve
Source: PeerJ. 2024 Oct 30;12:e18410. doi: 10.7717/peerj.18410 (PMC11531263; doi:10.7717/peerj.18410)
Supplement: Supplemental Information 1 [file peerj-12-18410-s001.xlsx]

## Sheet: Sheet1
		Ball speed and swing speed（km/h）										Ball toss and impact（m）									The moment the ball leaves the hand															The moment of the left knee's minimum flexion
		Ball speed （km/h）					swing speed（km/h）					Relative to geodesic origin: ball off hand position 4, highest point position 5, strike position 6									shoulder-hip angle		Body angle										Centre of gravity			Racket 2			shoulder-hip angle		Shoulder rotation		Hip rotation		Body angle
	District	Vtotal	Vxy	Vx	Vy	Vz	Vtotal	Vxy	Vx	Vy	Vz	X4	Y4	Z4	X5	Y5	Z5	X6	Y6	Z6	horizontal plane	vertical plane	Left shoulder	Right shoulder	Left elbow	Right elbow	Left hip	Right hip	Left knee	Right knee	Left ankle	Right ankle	X	Y	Z	Z	Y	X	horizontal plane	vertical plane	horizontal plane	vertical plane	horizontal plane	vertical plane	Left shoulder	Right shoulder	Left elbow	Right elbow	Left hip
DIA	Zone 1, first serve ,outside corner	142.009	141.639	-33.6753	137.578	-10.2424	150.04	149.107	-8.00857	148.892	16.7104	0.741221	0.1514	1.50502	1.46591	0.709169	5.46581	0.642446	0.639336	2.53993	1.80752	-0.868596	82.9738	44.8778	148.388	177.749	141.054	178.74	160.294	157.003	115.523	85.5071	0.363117	-0.433766	0.959646	-40.55	-19.5533	-11.9504	-68.7146	-21.9683	-20.1766	-16.6445	50.3455	4.45521	124.159	97.1639	160.992	85.1946	141.054
	Zone 1, second serve ,outside corner	132.423	132.245	-26.2084	129.622	-6.87046	122.376	121.274	-0.0203765	121.274	16.3914	0.785222	0.0759032	1.43379	1.71526	0.668158	8.80605	0.640647	0.543045	2.47968	8.04779	2.31381	81.2137	47.0287	153.66	176.051	144.354	165.414	165.966	142.258	107.033	82.9987	0.344911	-0.470847	0.948885	-21.9442	-69.2997	-46.5564	-50.3882	-17.5609	-3.51049	-14.9918	54.9255	4.88285	100.929	106.717	155.039	70.5207	144.354
DIA	Zone 1, first serve ,outside corner	134.659	134.55	-28.7596	131.441	-5.41315	122.043	121.748	7.66509	121.507	8.48207	1.24794	0.118817	1.35748	1.34142	0.700029	6.245	0.989832	0.245695	2.56984	3.5332	-5.13355	76.4846	56.0507	155.752	172.642	135.685	169.722	174.618	157.222	116.952	89.3775	0.840369	-0.399869	0.930909	-118.164	-73.3278	40.8395	-61.4246	-23.9929	-16.8861	-24.1031	48.0717	-5.24367	143.718	139.844	169.639	99.5511	135.685
	Zone 1, second serve ,outside corner	115.052	115.024	-25.98	112.051	-2.53339	131.095	127.974	21.0346	126.234	28.4326	1.2497	0.140622	1.38751	1.58839	0.161376	5.60663	0.996625	0.388423	2.54418	5.42228	-3.73728	79.5642	55.9674	158.418	175.616	142.593	169.981	177.46	157.273	110.949	92.201	0.834049	-0.38103	0.953162	-116.687	-72.4393	38.6126	3.00938	-17.6715	-3.28487	-18.9519	-0.871971	-5.01768	157.054	121.773	174.371	94.4048	142.593
DIA	Zone 1, first serve ,outside corner	160.006	158.994	-45.9497	152.209	-17.9654	149.72	149.678	-10.1119	149.336	3.56111	1.49014	0.132776	1.74324	2.26775	0.703711	5.60036	1.41943	0.502054	2.79934	7.91855	-6.94438	102.516	93.303	176.39	167.772	147.478	161.839	163.669	146.44	103.705	78.8172	1.11674	-0.578109	1.11776	-45.5672	-61.0914	-3.63198	5.76574	-27.7966	-2.47192	-26.6331	-0.319108	-5.78084	142.338	71.6893	163.468	56.7858	147.478
	Zone 1, second serve ,outside corner	144.196	143.83	-36.5053	139.12	-10.2702	152.196	149.947	10.5009	149.579	26.0671	1.46058	0.159464	1.76082	2.19275	1.32579	7.45405	1.25637	0.323614	2.83398	9.51514	-12.6778	116.348	100.029	171.382	170.294	152.804	158.147	168.879	143.239	105.811	80.8245	1.11223	-0.572116	1.09555	-104.409	-76.2344	39.5608	10.672	-32.8093	2.58622	-26.4597	1.4294	-6.32819	146.738	84.1653	160.931	65.9281	152.804
DIA	Zone 1, first serve ,outside corner	143.684	143.317	-30.494	140.035	-10.265	135.148	134.593	8.13151	134.347	12.2306	1.16246	0.26825	1.68086	1.0546	0.387467	5.85971	0.993795	0.50482	2.63868	4.71336	-10.0867	91.1348	36.8968	173.058	172.204	142.249	163.819	175.439	171.252	98.9284	94.268	0.740043	-0.292999	1.0893	-60.909	26.3784	0.319553	-5.80117	-23.7916	27.4769	-12.1837	37.9914	1.5211	148.458	60.888	154.142	98.1192	142.249
	Zone 1, second serve ,outside corner	127.262	127.213	-30.5665	123.486	-3.51467	165.502	160.513	26.5297	158.305	40.3315	1.1544	0.271733	1.65229	0.959864	-0.0617731	5.73273	0.872397	0.442689	2.70074	4.07299	-15.769	91.2629	39.4045	176.039	175.272	144.683	171.629	173.266	168.439	96.2706	93.9023	0.731832	-0.287002	1.06987	-53.5148	-15.7221	2.46493	-7.33715	-35.0884	15.1408	-17.7265	26.5509	1.59289	136.982	54.8731	155.577	78.2281	144.683
DIA	Zone 1, first serve ,outside corner	131.434	131.331	-27.5826	128.402	-5.2113	170.796	168.629	14.2102	168.029	27.1246	1.18617	0.149054	1.66073	-0.329049	-0.398284	8.25215	0.617016	0.555059	2.51218	7.53018	-5.10372	105.194	44.4183	172.252	174.798	139.728	167.078	170.89	172.481	97.6039	95.358	0.633074	-0.33648	1.05406	-28.9786	-4.50573	23.8406	-59.2759	-30.6054	-23.1304	-22.802	43.6757	2.69962	134.084	66.9881	176.662	80.1115	139.728
	Zone 1, second serve ,outside corner	133.548	133.082	-24.6799	130.774	-11.1482	159.371	155.606	22.1021	154.028	34.4367	1.11665	0.151267	1.68559	0.587307	0.117734	7.92897	0.49397	0.533651	2.52225	0.0033437	-6.13537	113.063	45.5611	172.27	173.415	142.54	168.976	165.758	170.291	102.151	91.5144	0.569277	-0.347528	1.03852	-19.6465	6.61264	35.2357	-55.4263	-24.3328	-16.7351	-15.4362	38.6945	2.7613	143.769	66.7704	176.836	86.2122	142.54
MS	Zone 1, first serve ,outside corner	146.366	146.211	-26.8465	143.725	-6.73104	145.434	140.633	6.83578	140.467	37.0598	1.05775	-0.145291	1.63067	0.602997	-0.00448043	2.86099	0.311946	0.134256	2.49574	0.200785	-1.9996	110.889	73.9603	168.143	97.6398	147.016	174.109	158.814	169.97	103.778	98.7491	0.466774	-0.242602	0.960107	-99.174	-5.1632	19.3094	-10.744	-16.9807	-7.63361	-29.1074	3.31117	-14.1263	151.098	78.1019	177.723	84.2546	147.016
	Zone 1, second serve ,outside corner	131.645	131.608	-22.9669	129.588	-3.11952	140.19	133.931	20.63	132.333	41.4205	0.996724	-0.131157	1.65306	0.576016	0.0342899	2.81652	0.29137	0.192744	2.52827	-7.26928	-7.27143	112.486	85.0465	172.187	142.293	148.903	167.023	154.326	170.643	100.554	105.33	0.427478	-0.254731	0.970053	-102.979	0.791369	4.90766	-15.7417	-25.1183	-10.4528	-29.7616	-1.98034	-11.9147	147.758	72.2207	172.834	78.0925	148.903
MS	Zone 1, first serve ,outside corner	155.836	155.434	-38.2322	150.659	-11.1799	166.618	165.691	-7.13579	165.537	17.555	1.21846	0.103901	1.8016	1.14957	0.36739	3.34091	1.11771	0.55431	2.73301	0.43442	-7.34901	111.327	66.4083	161.897	164.716	136.637	159.425	167.022	164.773	112.721	90.867	0.592923	-0.358787	1.13936	-17.1576	-10.1857	6.98456	-26.7908	-26.8976	-26.6871	-29.6438	0.538116	-10.0952	136.454	58.0451	167.846	69.2778	136.637
	Zone 1, second serve ,outside corner	125.088	125.03	-20.9961	123.254	-3.82128	146.176	142.602	9.87994	142.259	32.1264	1.23369	0.0802405	1.82184	1.06594	0.271139	3.35452	0.992374	0.408095	2.78173	4.63514	-8.63427	110.65	68.5598	162.829	167.374	143.988	164.687	165.828	166.285	119.431	101.13	0.601192	-0.34641	1.11414	-9.86583	-24.05	0.52182	-19.2324	-32.1216	-23.8723	-32.5823	-0.00480547	-9.09488	142.623	54.0498	162.685	64.2745	143.988
MS	Zone 1, first serve ,outside corner	129.888	129.711	-29.6901	126.267	-6.79159	143.087	142.567	48.663	134.005	12.1857	1.80921	0.14592	1.72772	1.50368	0.275515	3.44754	1.50983	0.352506	2.68912	3.33069	-7.44555	106.296	39.3105	170.843	167.978	140.702	165.029	158.9	158.634	95.434	105.727	1.21803	-0.232532	1.00372	-72.8604	-36.1819	20.2003	1.5759	-17.5392	1.09341	-15.6711	2.84819	-5.57739	127.867	57.2624	165.33	83.5849	140.702
	Zone 1, second serve ,outside corner	128.551	128.387	-27.7305	125.356	-6.49729	154.585	152.875	44.2156	146.342	22.9274	1.79787	0.17124	1.60761	1.3986	0.231543	3.64423	1.26408	0.248214	2.69361	4.34911	-8.40776	93.419	36.0842	162.464	168.188	147.2	168.3	153.082	155.803	94.2986	104.215	1.19994	-0.219147	0.99221	-62.2071	-25.6162	13.5023	2.18259	-17.7138	-6.33485	-22.7162	-4.16833	-13.4102	145.452	58.0447	179.388	78.7564	147.2
MS	Zone 1, first serve ,outside corner	152.625	152.215	-33.9077	148.391	-11.1739	151.925	150.044	8.89039	149.78	23.8306	1.47058	0.253997	1.46146	1.15587	0.341324	3.21731	1.03371	0.402236	2.55389	-1.65425	-4.94244	93.5899	20.9634	144.285	172.135	155.657	174.898	175.84	168.544	117.055	87.2325	1.01683	-0.267838	0.930064	-82.1144	-19.2423	6.54803	-10.2552	-9.85565	-19.3024	-9.34785	-10.7015	-4.43464	156.558	86.9768	150.551	111.867	155.657
	Zone 1, second serve ,outside corner	127.202	127.2	-23.3007	125.047	-0.799368	140.523	132.879	22.0208	131.042	45.7136	1.51211	0.233277	1.52467	0.208158	0.721192	4.88924	0.868051	0.363258	2.50146	3.22456	-6.45031	97.7076	24.1435	166.1	166.058	162.579	172.557	174.26	168.447	120.274	92.7041	1.05528	-0.27278	0.934962	-78.9101	-14.5891	3.05199	-9.31544	-3.10091	-20.0278	-6.65966	-7.48784	-10.0091	160.964	83.9844	152.254	109.681	162.579
MS	Zone 1, first serve ,outside corner	141.455	141.195	-27.8914	138.413	-8.56805	124.705	122.745	1.83561	122.731	22.0273	0.993379	0.118033	1.57717	0.650824	0.327554	4.12858	0.338777	0.420346	2.568	-1.69273	3.34623	96.2554	80.7842	154.181	101.448	152.825	169.793	169.184	170.499	100.158	94.4285	0.477156	-0.423315	1.02179	-133.779	-43.7205	72.4205	-2.59578	-20.1296	12.0682	-36.1338	12.9712	-12.658	128.296	89.8175	163.326	50.5612	152.825
	Zone 1, second serve ,outside corner	131.039	130.978	-27.1901	128.125	-3.9845	121.702	118.175	0.597652	118.174	29.0852	1.05786	0.0583589	1.61857	0.605028	0.203891	3.61623	0.439364	0.269373	2.62317	-7.68817	0.620615	99.2766	83.8848	161.236	109.987	155.283	172.612	171.668	173.409	98.5716	94.8715	0.489504	-0.407809	1.01443	-133.266	-37.5998	69.1513	-2.91221	-19.9666	9.79812	-33.9246	5.02216	-13.3374	130.221	82.49	160.454	46.2927	155.283
[truncated: 49 more columns]
